# Supplementary material
Source: PubMed Central journal article supplement (PMC4667722)
Supplement: NIHMS740848-supplement-Supplemental_Info.pdf [file NIHMS740848-supplement-Supplemental_Info.pdf]

Supplemental Materials

**Glutathione Reaction Products with the Chemical Allergen,  
Methylene-Diphenyl Diisocyanate, Stimulate Alternative Macrophage  
Activation and Eosinophilic Airway Inflammation**

*Adam V Wisnewski\*<sup>1</sup>, Jian Liu<sup>1</sup>, Christopher M Colangelo<sup>2</sup>*

*Departments of Internal Medicine<sup>1</sup> and Molecular Biophysics & Biochemistry<sup>2</sup>; Yale University*

*School of Medicine, New Haven, CT*

|                                                                                                                                                                                                        |          |
|--------------------------------------------------------------------------------------------------------------------------------------------------------------------------------------------------------|----------|
| <b>Supplemental Figure S1</b> .....                                                                                                                                                                    | <b>2</b> |
| Data characterizing the GSH-MDI reaction products generated in vitro.                                                                                                                                  |          |
| <b>Supplemental Figure S2</b> .....                                                                                                                                                                    | <b>3</b> |
| MS/MS data defining unique modification of murine albumin K <sup>414</sup> .                                                                                                                           |          |
| <b>Supplemental Table S1</b> .....                                                                                                                                                                     | <b>4</b> |
| Peptides from BAL Fluid Positively Matched to Mouse Albumin or Mouse Albumin +<br>MDI-GSH.                                                                                                             |          |
| <b>Supplemental Table S2</b> .....                                                                                                                                                                     | <b>6</b> |
| Differences in amount of different ions with masses that match peptides of mouse<br>albumin, or MDI modified mouse albumin from GSH-MDI exposed mice (e.g. 114 and<br>115) vs. controls (116 and 117). |          |
| <b>Supplemental References</b> .....                                                                                                                                                                   | <b>8</b> |

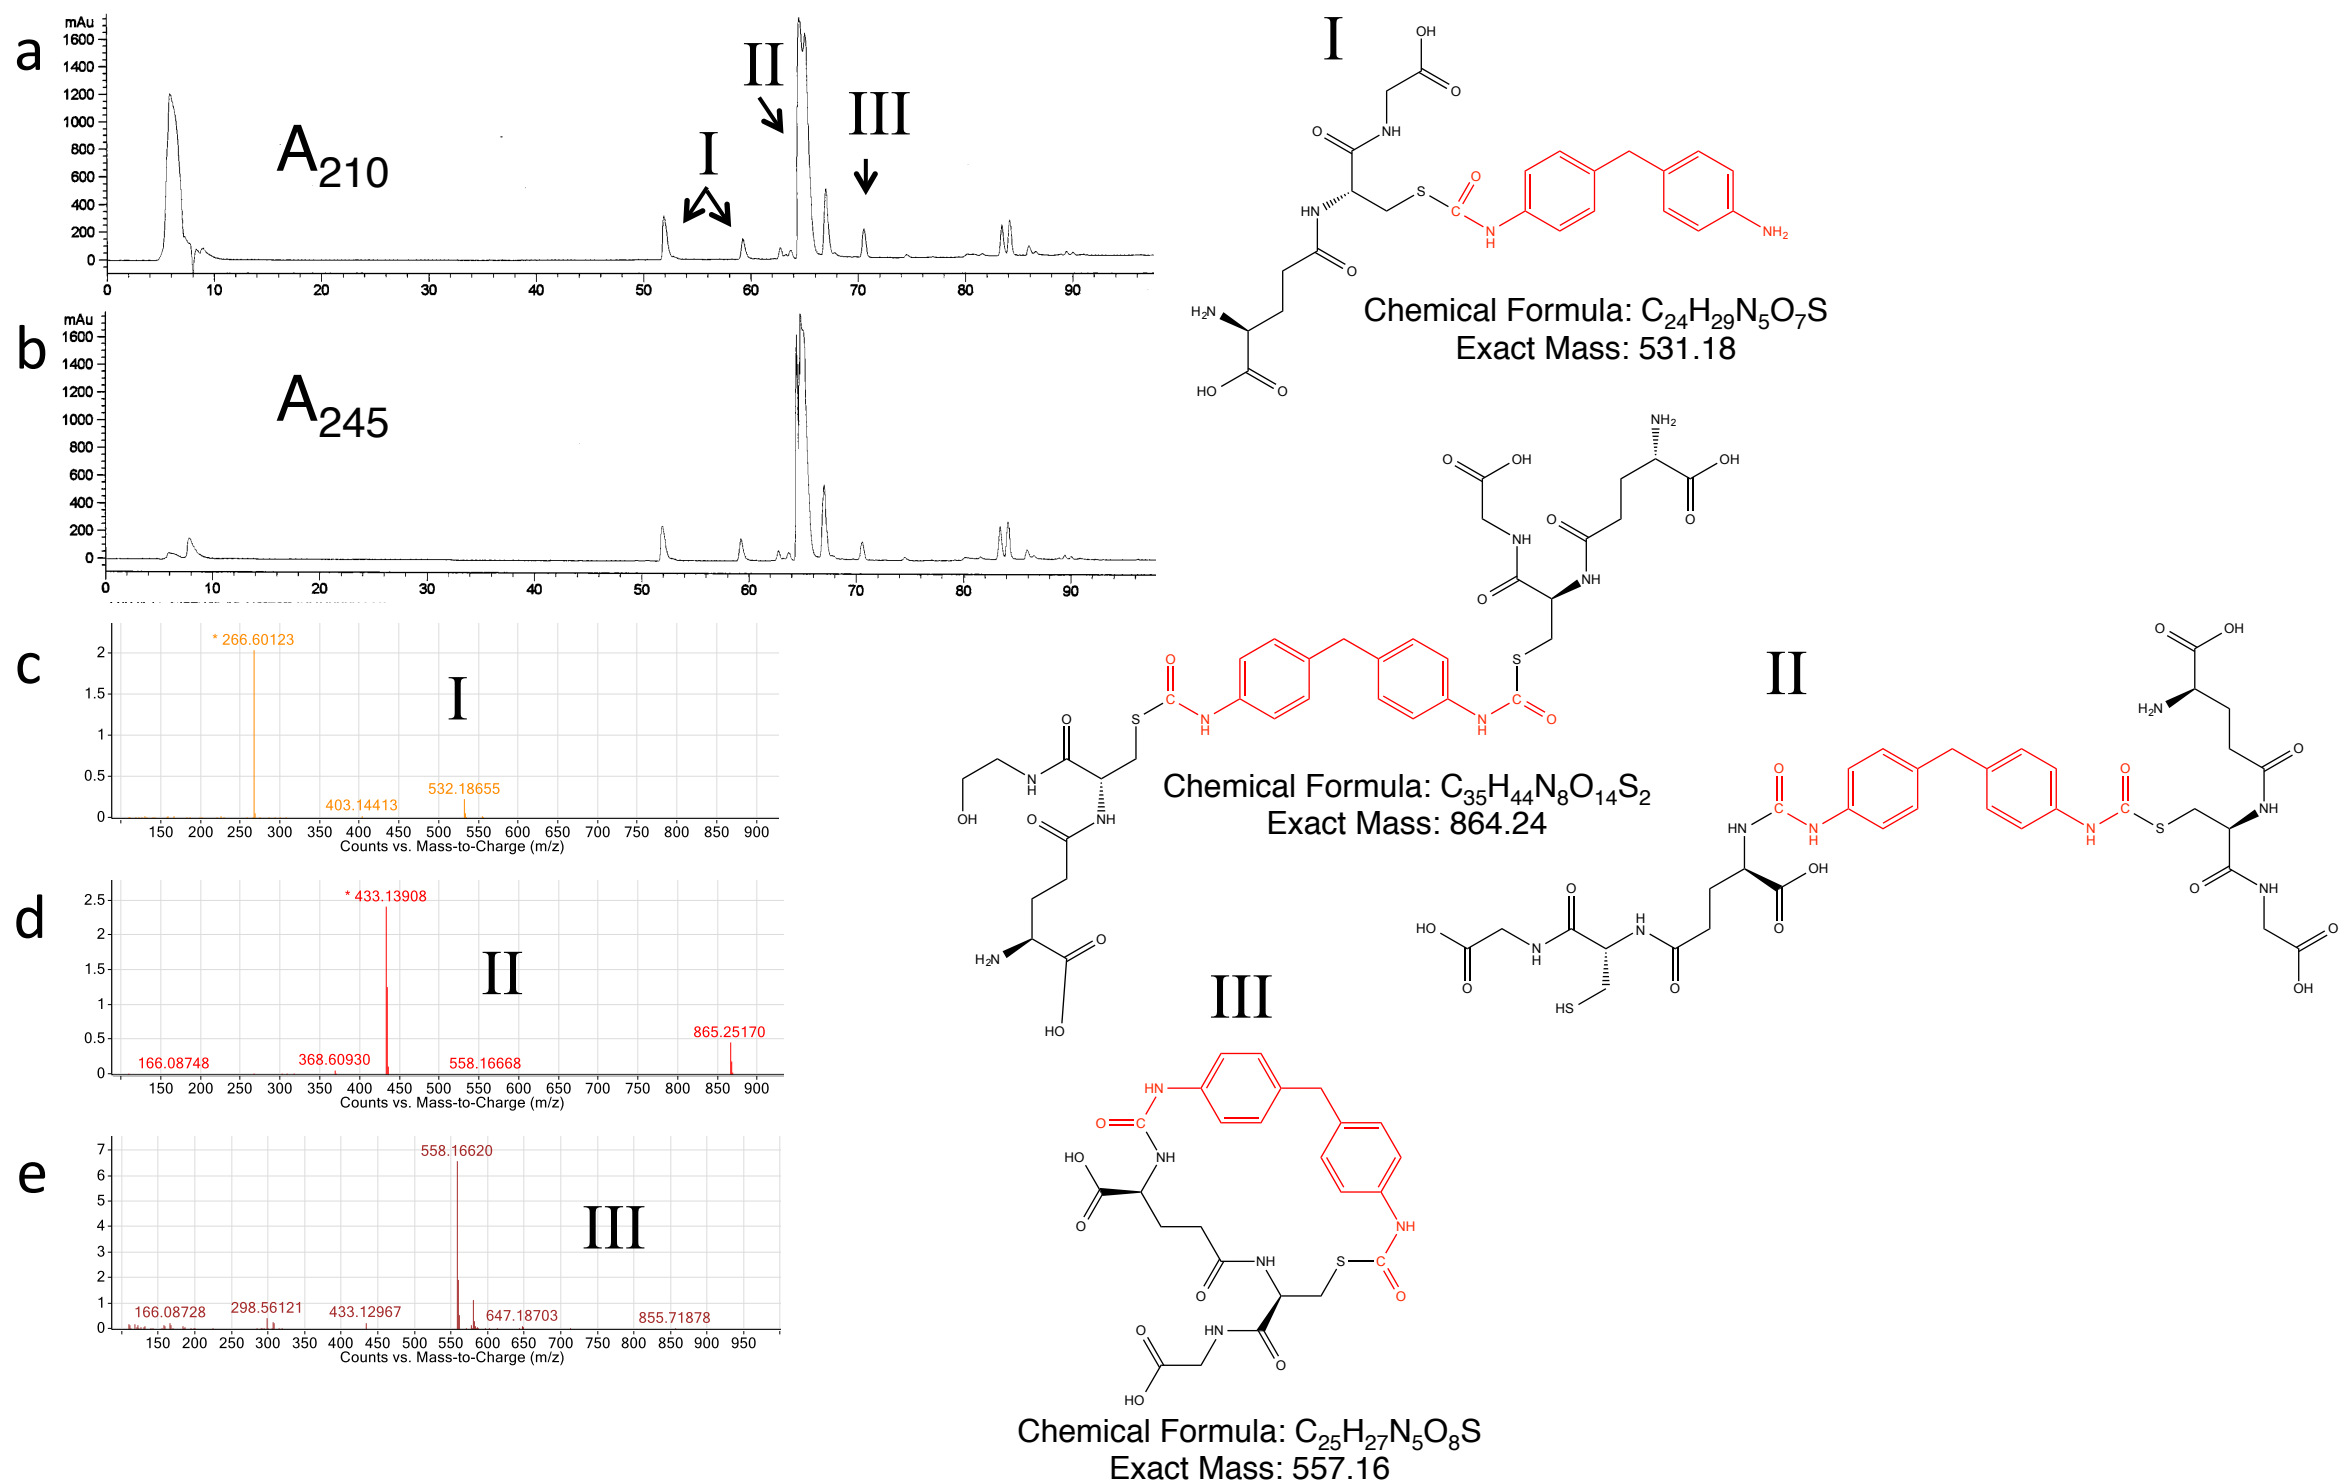

Supplemental Figure S1. Data characterizing the GSH-MDI reaction products generated in vitro. Panels a & b show  $A_{210}$  and  $A_{245}$  of different fractions of GSH-MDI reaction products separated by reverse phase HPLC as described. Panels c, d, and e show LC-MS data for different purified fractions (labeled I, II, III), which correspond to the structures shown on the right, as previously described,<sup>1-3</sup> or an asymmetric (*S,N'*-linked) bis(GSH)-MDI also shown, which could theoretically form via direct reactivity between GSH and MDI, or via inter- or intra-molecular rearrangement of (*S,S'*-linked) bis(GSH)-MDI.

Supplemental Figure S2. MS/MS data defining unique modification of murine albumin K<sup>414</sup>. Data from iTRAQ experiments were queried for the expected 614 atomic mass unit modification due to GSH-MDI addition and carbamidomethylation (during sample workup). Raw data from the MASCOT search engine showing b- and y-ions confirming amino acid sequence, and modification on the K residue.

## MATRIX SCIENCE Mascot Search Results

### Peptide View

MS/MS Fragmentation of **YTQKAPQVSTPTLVEAAR**

Found in **ALBU\_MOUSE** in **SwissProt**, Serum albumin OS=Mus musculus GN=Alb PE=1 SV=3

Match to Query 94630: 2717.352432 from(906.791420,3+) rtinseconds(5898) index(28730)

Title: Locus:1.1.1.9243.3 File:"5600TT14-1047.wiff"

Data file C:\Program Files (x86)\Matrix Science\Mascot Daemon\mgf\835 Copy of Wisnewski 4-PLEX MDI mod 10 fractions\mascot\_daemon\_merge.mgf

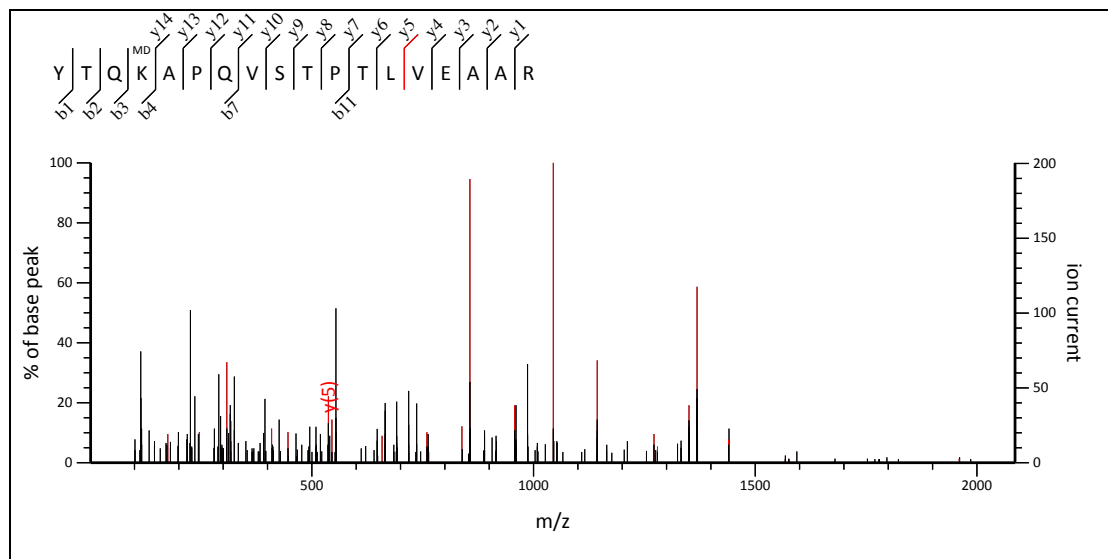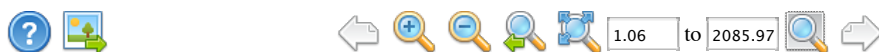

Label all possible matches  Label matches used for scoring

**Monoisotopic mass of neutral peptide Mr(calc):** 2717.3241

**Fixed modifications:** Carbamidomethyl (C), iTRAQ4plex (N-term), iTRAQ4plex (K) (apply to specified residues or termini only)

**Variable modifications:**

**K4** : MDI\_614\_KNH (HKN)

**Ions Score:** 54 **Expect:** 8e-06

**Matches** : 24/192 fragment ions using 97 most intense peaks ([help](#))

| #  | b         | b <sup>++</sup> | b <sup>*</sup> | b <sup>+++</sup> | b <sup>0</sup> | b <sup>0++</sup> | Seq. | y         | y <sup>++</sup> | y <sup>*</sup> | y <sup>+++</sup> | y <sup>0</sup> | y <sup>0++</sup> | #  |
|----|-----------|-----------------|----------------|------------------|----------------|------------------|------|-----------|-----------------|----------------|------------------|----------------|------------------|----|
| 1  | 308.1727  | 154.5900        |                |                  |                |                  | Y    |           |                 |                |                  |                |                  | 18 |
| 2  | 409.2203  | 205.1138        |                |                  | 391.2098       | 196.1085         | T    | 2411.1660 | 1206.0866       | 2394.1394      | 1197.5734        | 2393.1554      | 1197.0813        | 17 |
| 3  | 537.2789  | 269.1431        | 520.2524       | 260.6298         | 519.2684       | 260.1378         | Q    | 2310.1183 | 1155.5628       | 2293.0918      | 1147.0495        | 2292.1077      | 1146.5575        | 16 |
| 4  | 1279.5534 | 640.2803        | 1262.5268      | 631.7671         | 1261.5428      | 631.2750         | K    | 2182.0597 | 1091.5335       | 2165.0332      | 1083.0202        | 2164.0492      | 1082.5282        | 15 |
| 5  | 1350.5905 | 675.7989        | 1333.5639      | 667.2856         | 1332.5799      | 666.7936         | A    | 1439.7853 | 720.3963        | 1422.7587      | 711.8830         | 1421.7747      | 711.3910         | 14 |
| 6  | 1447.6433 | 724.3253        | 1430.6167      | 715.8120         | 1429.6327      | 715.3200         | P    | 1368.7482 | 684.8777        | 1351.7216      | 676.3644         | 1350.7376      | 675.8724         | 13 |
| 7  | 1575.7018 | 788.3546        | 1558.6753      | 779.8413         | 1557.6913      | 779.3493         | Q    | 1271.6954 | 636.3513        | 1254.6688      | 627.8381         | 1253.6848      | 627.3461         | 12 |
| 8  | 1674.7703 | 837.8888        | 1657.7437      | 829.3755         | 1656.7597      | 828.8835         | V    | 1143.6368 | 572.3220        | 1126.6103      | 563.8088         | 1125.6263      | 563.3168         | 11 |
| 9  | 1761.8023 | 881.4048        | 1744.7757      | 872.8915         | 1743.7917      | 872.3995         | S    | 1044.5684 | 522.7878        | 1027.5419      | 514.2746         | 1026.5578      | 513.7826         | 10 |
| 10 | 1862.8500 | 931.9286        | 1845.8234      | 923.4153         | 1844.8394      | 922.9233         | T    | 957.5364  | 479.2718        | 940.5098       | 470.7586         | 939.5258       | 470.2665         | 9  |
| 11 | 1959.9027 | 980.4550        | 1942.8762      | 971.9417         | 1941.8922      | 971.4497         | P    | 856.4887  | 428.7480        | 839.4621       | 420.2347         | 838.4781       | 419.7427         | 8  |
| 12 | 2060.9504 | 1030.9788       | 2043.9239      | 1022.4656        | 2042.9398      | 1021.9736        | T    | 759.4359  | 380.2216        | 742.4094       | 371.7083         | 741.4254       | 371.2163         | 7  |
| 13 | 2174.0345 | 1087.5209       | 2157.0079      | 1079.0076        | 2156.0239      | 1078.5156        | L    | 658.3883  | 329.6978        | 641.3617       | 321.1845         | 640.3777       | 320.6925         | 6  |
| 14 | 2273.1029 | 1137.0551       | 2256.0763      | 1128.5418        | 2255.0923      | 1128.0498        | V    | 545.3042  | 273.1557        | 528.2776       | 264.6425         | 527.2936       | 264.1504         | 5  |
| 15 | 2402.1455 | 1201.5764       | 2385.1189      | 1193.0631        | 2384.1349      | 1192.5711        | E    | 446.2358  | 223.6215        | 429.2092       | 215.1083         | 428.2252       | 214.6162         | 4  |
| 16 | 2473.1826 | 1237.0949       | 2456.1560      | 1228.5817        | 2455.1720      | 1228.0897        | A    | 317.1932  | 159.1002        | 300.1666       | 150.5870         |                |                  | 3  |
| 17 | 2544.2197 | 1272.6135       | 2527.1932      | 1264.1002        | 2526.2091      | 1263.6082        | A    | 246.1561  | 123.5817        | 229.1295       | 115.0684         |                |                  | 2  |
| 18 |           |                 |                |                  |                |                  | R    | 175.1190  | 88.0631         | 158.0924       | 79.5498          |                |                  | 1  |

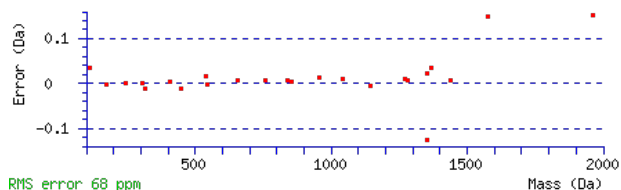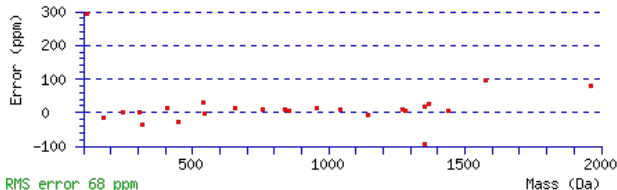

NCBI BLAST search of **YTQKAPQVSTPTLVEAAR**

(Parameters: blastp, nr protein database, expect=20000, no filter, PAM30)

Other BLAST [web gateways](#)

All matches to this query

| Score | Mr(calc)  | Delta  | Sequence                  |
|-------|-----------|--------|---------------------------|
| 54.4  | 2717.3241 | 0.0283 | <b>YTQKAPQVSTPTLVEAAR</b> |

Mascot: <http://www.matrixscience.com/>

Supplemental Table S1. Peptides from BAL Fluid Positively Matched to Mouse Albumin or Mouse Albumin + MDI-GSH. List of the ion masses that match peptides of mouse albumin, or MDI modified mouse albumin, from samples of airway fluid of GSH-MDI exposed mice. Data from the MASCOT search engine includes the MASCOT Score, Expectation, Deduced Peptide Sequence, Start/End position in the mature albumin protein, m/z, Measured Ion Mass, Calculated Ion Mass, the difference from the expected value, the relative difference in ppm, and the ion charge. The ion mass corresponding to the GSH-MDI modified murine albumin peptide of interest is highlighted.

| Score  | Expectation | Peptide Sequence                                     | Start | End | M/Z       | Ion Mass  | Ion Mass(calc) | Delta   | ppm  | Charge |
|--------|-------------|------------------------------------------------------|-------|-----|-----------|-----------|----------------|---------|------|--------|
| 164.24 | 6.20E-14    | K.AHCLSEVEHDTMPADLPAIAADFVEDQEVECK.N                 | 287   | 317 | 947.2069  | 3784.7986 | 3784.7626      | 0.0359  | 9.5  | 4      |
| 131.96 | 1.10E-10    | K.AHCLSEVEHDTMPADLPAIAADFVEDQEVECK.N                 | 287   | 317 | 757.9645  | 3784.7862 | 3784.7626      | 0.0236  | 6.2  | 5      |
| 123.07 | 8.90E-10    | K.AHCLSEVEHDTMPADLPAIAADFVEDQEVECK.N + Oxidation (M) | 287   | 317 | 951.2038  | 3800.7863 | 3800.7576      | 0.0287  | 7.6  | 4      |
| 122.94 | 2.50E-10    | K.TVMDDFAQFLDTCKK.A + Oxidation (M)                  | 546   | 560 | 1077.996  | 2153.9774 | 2153.9676      | 0.0099  | 4.6  | 2      |
| 122.46 | 2.70E-10    | K.TVMDDFAQFLDTCKK.A                                  | 546   | 560 | 1070.0015 | 2137.9885 | 2137.9727      | 0.0158  | 7.4  | 2      |
| 120.78 | 1.60E-10    | R.LSQTFFPNADFAEITK.L                                 | 219   | 233 | 985.5344  | 1969.0542 | 1969.04        | 0.0142  | 7.2  | 2      |
| 119.53 | 5.50E-10    | K.TVMDDFAQFLDTCKK.A + Oxidation (M)                  | 546   | 560 | 718.998   | 2153.9722 | 2153.9676      | 0.0047  | 2.2  | 3      |
| 112.97 | 2.30E-09    | K.ENPTTFMGHLYHEVAR.R + Oxidation (M)                 | 129   | 144 | 516.2534  | 2060.9844 | 2060.986       | -0.0016 | -0.8 | 4      |
| 111.21 | 1.20E-08    | R.RHPYFYAPPELLYAAEQYNEILTQCCAEADK.E                  | 145   | 174 | 1011.7459 | 4042.9547 | 4042.9113      | 0.0434  | 10.7 | 4      |
| 110.85 | 1.30E-08    | R.RHPYFYAPPELLYAAEQYNEILTQCCAEADK.E                  | 145   | 174 | 809.5971  | 4042.9492 | 4042.9113      | 0.0379  | 9.4  | 5      |
| 110.8  | 1.40E-08    | R.HPYFYAPPELLYAAEQYNEILTQCCAEADK.E                   | 146   | 174 | 972.7193  | 3886.8483 | 3886.8102      | 0.0381  | 9.8  | 4      |
| 109.86 | 1.10E-08    | K.CCAEANPPACYGTVLAEFQPLVEEPK.N                       | 360   | 385 | 1080.1943 | 3237.561  | 3237.5388      | 0.0222  | 6.9  | 3      |
| 108.57 | 6.50E-09    | K.TVMDDFAQFLDTCKK.A + Oxidation (M)                  | 546   | 560 | 539.4965  | 2153.9571 | 2153.9676      | -0.0105 | -4.9 | 4      |
| 108.22 | 3.70E-10    | K.GLVLIASFQYLQK.A                                    | 21    | 33  | 590.0268  | 1767.0585 | 1767.0538      | 0.0047  | 2.7  | 3      |
| 108.16 | 2.60E-08    | R.HPYFYAPPELLYAAEQYNEILTQCCAEADK.E                   | 146   | 174 | 778.3763  | 3886.8453 | 3886.8102      | 0.0351  | 9    | 5      |
| 105.42 | 1.40E-08    | K.TVMDDFAQFLDTCKK.A                                  | 546   | 560 | 535.4996  | 2137.9693 | 2137.9727      | -0.0034 | -1.6 | 4      |
| 104.25 | 5.00E-09    | K.LGEYGFQNAIVLR.Y                                    | 398   | 410 | 541.9699  | 1622.8878 | 1622.8902      | -0.0025 | -1.5 | 3      |
| 100.37 | 1.80E-08    | R.LSQTFFPNADFAEITK.L                                 | 219   | 233 | 657.3571  | 1969.0494 | 1969.04        | 0.0094  | 4.8  | 3      |
| 96.83  | 5.30E-08    | K.DVFLGTFLYEYSR.R                                    | 324   | 336 | 585.3025  | 1752.8856 | 1752.8845      | 0.0011  | 0.6  | 3      |
| 96.44  | 5.50E-08    | K.TCVADESAANCDK.S                                    | 52    | 64  | 576.9322  | 1727.7748 | 1727.7698      | 0.005   | 2.9  | 3      |
| 95.96  | 5.00E-08    | R.LPCVEDYLSAILNR.V                                   | 446   | 459 | 602.9908  | 1805.9506 | 1805.9467      | 0.0038  | 2.1  | 3      |
| 93.48  | 5.00E-08    | K.APQVSTPTLVEAAR.N                                   | 415   | 428 | 528.6339  | 1582.8799 | 1582.8801      | -0.0002 | -0.1 | 3      |
| 92.07  | 6.90E-08    | K.ECCHGDLLCADDR.A                                    | 244   | 257 | 631.9308  | 1892.7707 | 1892.7573      | 0.0133  | 7    | 3      |
| 90.99  | 2.30E-07    | K.DTCFSTEGPNLVTR.C                                   | 565   | 578 | 580.951   | 1739.8313 | 1739.8271      | 0.0042  | 2.4  | 3      |
| 89.73  | 1.00E-07    | K.LVQEVTFDAK.T                                       | 42    | 51  | 479.9442  | 1436.8108 | 1436.8119      | -0.0011 | -0.8 | 3      |
| 88.41  | 6.20E-07    | K.ENPTTFMGHLYHEVAR.R                                 | 129   | 144 | 512.2547  | 2044.9897 | 2044.9911      | -0.0014 | -0.7 | 4      |
| 87.89  | 7.20E-07    | K.AETTFHSDICTLPEK.E                                  | 504   | 519 | 546.7771  | 2183.0794 | 2183.0813      | -0.0019 | -0.9 | 4      |
| 87.88  | 2.60E-07    | R.LPCVEDYLSAILNR.V + iTRAQ4plex (Y)                  | 446   | 459 | 651.0242  | 1950.0508 | 1950.0488      | 0.002   | 1    | 3      |
| 87.87  | 1.80E-07    | R.HPDYSVSLLLR.L                                      | 338   | 348 | 481.9402  | 1442.7989 | 1442.8003      | -0.0014 | -1   | 3      |
| 87.55  | 3.40E-07    | R.LPCVEDYLSAILNR.V                                   | 446   | 459 | 903.9837  | 1805.9528 | 1805.9467      | 0.0061  | 3.4  | 2      |
| 86.94  | 0.0000034   | K.AHCLSEVEHDTMPADLPAIAADFVEDQEVECK.N                 | 287   | 317 | 631.8064  | 3784.7949 | 3784.7626      | 0.0322  | 8.5  | 6      |
| 84.52  | 0.0000038   | K.CCAEANPPACYGTVLAEFQPLVEEPK.N                       | 360   | 385 | 810.3964  | 3237.5565 | 3237.5388      | 0.0176  | 5.4  | 4      |
| 84.46  | 3.30E-07    | R.RHPDYSVSLLLR.L                                     | 337   | 348 | 533.975   | 1598.9031 | 1598.9014      | 0.0016  | 1    | 3      |
| 82.94  | 0.0000022   | K.ENPTTFMGHLYHEVAR.R                                 | 129   | 144 | 682.6732  | 2044.9977 | 2044.9911      | 0.0066  | 3.2  | 3      |
| 82.52  | 5.20E-07    | K.APQVSTPTLVEAAR.N                                   | 415   | 428 | 792.4525  | 1582.8904 | 1582.8801      | 0.0104  | 6.6  | 2      |
| 81.26  | 0.0000014   | R.YNDLGEQHF.K.G                                      | 11    | 20  | 513.5988  | 1537.7746 | 1537.7769      | -0.0023 | -1.5 | 3      |
| 80.91  | 0.0000023   | K.DTCFSTEGPNLVTR.C                                   | 565   | 578 | 870.9261  | 1739.8377 | 1739.8271      | 0.0107  | 6.1  | 2      |
| 79.86  | 0.0000024   | R.ENYGELADCTK.Q                                      | 82    | 93  | 583.2672  | 1746.7797 | 1746.7796      | 0.0001  | 0.1  | 3      |
| 79.44  | 0.000016    | R.RHPYFYAPPELLYAAEQYNEILTQCCAEADK.E + iTRAQ4plex (Y) | 145   | 174 | 838.4158  | 4187.0425 | 4187.0134      | 0.0292  | 7    | 5      |
| 78.56  | 0.0000017   | K.ECCHGDLLCADDR.A                                    | 244   | 257 | 947.3946  | 1892.7747 | 1892.7573      | 0.0174  | 9.2  | 2      |
| 77.96  | 0.0000014   | K.LVQEVTFDAK.T                                       | 42    | 51  | 719.4154  | 1436.8162 | 1436.8119      | 0.0043  | 3    | 2      |
| 76.97  | 0.0000089   | K.AETTFHSDICTLPEK.E                                  | 504   | 519 | 728.7003  | 2183.0791 | 2183.0813      | -0.0022 | -1   | 3      |
| 76.24  | 0.000043    | R.RHPYFYAPPELLYAAEQYNEILTQCCAEADK.E                  | 145   | 174 | 674.8287  | 4042.9285 | 4042.9113      | 0.0172  | 4.3  | 6      |
| 75.54  | 9.10E-07    | K.QTALAELVK.H                                        | 526   | 534 | 420.929   | 1259.7652 | 1259.7693      | -0.004  | -3.2 | 3      |
| 74.54  | 0.000016    | K.AADKDTCFSTEGPNLVTR.C                               | 561   | 578 | 757.3831  | 2269.1275 | 2269.1252      | 0.0023  | 1    | 3      |
| 73.98  | 0.000011    | K.YMCENQATISSK.L + Oxidation (M)                     | 263   | 274 | 579.2796  | 1734.8169 | 1734.816       | 0.0009  | 0.5  | 3      |
| 73.52  | 0.000012    | K.YMCENQATISSK.L                                     | 263   | 274 | 573.9484  | 1718.8233 | 1718.8211      | 0.0022  | 1.3  | 3      |
| 70.94  | 0.00001     | K.LGEYGFQNAIVLR.Y                                    | 398   | 410 | 812.4528  | 1622.891  | 1622.8902      | 0.0008  | 0.5  | 2      |
| 70.25  | 0.0000015   | K.GLVLIASFQYLQK.C + iTRAQ4plex (Y)                   | 21    | 33  | 478.7948  | 1911.1501 | 1911.1559      | -0.0058 | -3   | 4      |
| 70.16  | 0.000026    | R.RPCFSALTVDETVVPK.E                                 | 485   | 500 | 724.3834  | 2170.1283 | 2170.1336      | -0.0053 | -2.4 | 3      |
| 69.32  | 0.000011    | R.RHPDYSVSLLLR.L                                     | 337   | 348 | 400.7323  | 1598.9    | 1598.9014      | -0.0014 | -0.9 | 4      |
| 68.86  | 0.0000042   | K.QTALAELVK.H                                        | 526   | 534 | 630.8913  | 1259.7681 | 1259.7693      | -0.0011 | -0.9 | 2      |
| 67.5   | 0.000074    | K.ENPTTFMGHLYHEVAR.R + iTRAQ4plex (Y)                | 129   | 144 | 438.8252  | 2189.0899 | 2189.0931      | -0.0033 | -1.5 | 5      |
| 66.71  | 0.00002     | R.YTQKAPQVSTPTLVEAAR.N                               | 411   | 428 | 750.0915  | 2247.2528 | 2247.2467      | 0.0062  | 2.8  | 3      |
| 65.78  | 0.000023    | K.SLHTLFGDK.L                                        | 65    | 73  | 435.9182  | 1304.7326 | 1304.7332      | -0.0006 | -0.5 | 3      |
| 65.67  | 0.0000048   | K.GLVLIASFQYLQK.C + iTRAQ4plex (Y)                   | 21    | 33  | 638.0565  | 1911.1476 | 1911.1559      | -0.0083 | -4.3 | 3      |
| 64.93  | 0.000074    | R.LSQTFFPNADFAEITK.L                                 | 219   | 233 | 493.2666  | 1969.0371 | 1969.04        | -0.0029 | -1.5 | 4      |
| 64.69  | 0.000084    | K.DVFLGTFLYEYSR.R                                    | 324   | 336 | 877.4534  | 1752.8922 | 1752.8845      | 0.0078  | 4.4  | 2      |
| 64.26  | 0.000003    | K.QTALAELVK.H                                        | 525   | 534 | 511.6644  | 1531.9712 | 1531.9663      | 0.0049  | 3.2  | 3      |
| 63.45  | 0.000098    | R.ENYGELADCTK.Q                                      | 82    | 93  | 437.7003  | 1746.7719 | 1746.7796      | -0.0077 | -4.4 | 4      |
| 62.75  | 0.000064    | K.TNCDLYEK.L                                         | 390   | 397 | 665.8298  | 1329.645  | 1329.6478      | -0.0029 | -2.2 | 2      |
| 60.53  | 0.000091    | R.YTQKAPQVSTPTLVEAAR.N                               | 411   | 428 | 562.819   | 2247.2471 | 2247.2467      | 0.0004  | 0.2  | 4      |
| 59.88  | 0.000099    | K.TPVEHVTK.C                                         | 467   | 475 | 429.2495  | 1284.7266 | 1284.7281      | -0.0016 | -1.2 | 3      |
| 57.89  | 0.00018     | K.LGEYGFQNAIVLR.Y + iTRAQ4plex (Y)                   | 398   | 410 | 442.7531  | 1766.9833 | 1766.9923      | -0.009  | -5.1 | 4      |
| 57.81  | 0.000055    | K.CCSGSLVER.R                                        | 476   | 484 | 606.2842  | 1210.5538 | 1210.5556      | -0.0018 | -1.5 | 2      |
| 57.59  | 0.00016     | K.TPVEHVTK.C                                         | 467   | 475 | 643.373   | 1284.7314 | 1284.7281      | 0.0033  | 2.6  | 2      |

|       |         |                                                     |     |     |          |           |           |         |      |   |
|-------|---------|-----------------------------------------------------|-----|-----|----------|-----------|-----------|---------|------|---|
| 57.14 | 0.00044 | K.DVFLGTFLYEYSR.R + iTRAQ4plex (Y)                  | 324 | 336 | 633.3375 | 1896.9907 | 1896.9865 | 0.0042  | 2.2  | 3 |
| 56.71 | 0.0002  | K.LGEYGFQNAILVR.Y + iTRAQ4plex (Y)                  | 398 | 410 | 590.0044 | 1766.9914 | 1766.9923 | -0.0008 | -0.5 | 3 |
| 55.4  | 0.0028  | K.DDNPSLPPFERPEAEAMCTSFK.E + Oxidation (M)          | 107 | 128 | 711.3392 | 2841.3278 | 2841.3193 | 0.0085  | 3    | 4 |
| 54.35 | 0.0022  | R.YTQKAPQVSTPTLVEAAR.N + MDI_614_KNH (HKN)          | 411 | 428 | 906.7914 | 2717.3524 | 2717.3481 | 0.0043  | 1.5  | 3 |
| 54.07 | 0.00012 | K.LATDLTK.V                                         | 234 | 240 | 525.3246 | 1048.6347 | 1048.6372 | -0.0025 | -2.4 | 2 |
| 53.92 | 0.00032 | K.ECCHGDLLECADDR.A                                  | 244 | 257 | 474.1965 | 1892.7571 | 1892.7573 | -0.0003 | -0.2 | 4 |
| 53.35 | 0.0043  | K.DDNPSLPPFERPEAEAMCTSFK.E                          | 107 | 128 | 707.3398 | 2825.3301 | 2825.3244 | 0.0057  | 2    | 4 |
| 53.24 | 0.0005  | K.LGEYGFQNAILVRYTQK.A                               | 398 | 414 | 572.8237 | 2287.2658 | 2287.2568 | 0.009   | 3.9  | 4 |
| 52.51 | 0.00025 | K.ATAEQLK.T                                         | 539 | 545 | 524.8152 | 1047.6157 | 1047.6168 | -0.001  | -1   | 2 |
| 51.82 | 0.0051  | K.ECCHGDLLECADDR.AELAK.Y                            | 244 | 262 | 638.2968 | 2549.158  | 2549.1552 | 0.0028  | 1.1  | 4 |
| 51.75 | 0.0031  | K.DTCFSTEGPNLVTRCK.D                                | 565 | 580 | 544.0215 | 2172.0569 | 2172.0547 | 0.0022  | 1    | 4 |
| 50.82 | 0.00078 | K.YEATLEK.C                                         | 353 | 359 | 571.3211 | 1140.6277 | 1140.627  | 0.0007  | 0.6  | 2 |
| 50.03 | 0.00068 | R.VCLLHEK.T                                         | 460 | 466 | 593.845  | 1185.6753 | 1185.6783 | -0.003  | -2.5 | 2 |
| 50.03 | 0.014   | R.RHPYFYAPPELLYAEQYNEILTQCCAEADK.E + iTRAQ4plex (Y) | 145 | 174 | 698.8474 | 4187.0407 | 4187.0134 | 0.0273  | 6.5  | 6 |
| 49.57 | 0.0006  | K.CCTLPEDQR.L                                       | 437 | 445 | 661.8012 | 1321.5878 | 1321.5877 | 0.0001  | 0.1  | 2 |
| 49.51 | 0.01    | K.DDNPSLPPFERPEAEAMCTSFK.E                          | 107 | 128 | 942.7874 | 2825.3404 | 2825.3244 | 0.016   | 5.7  | 3 |
| 49.18 | 0.0017  | R.NECFLQHK.D                                        | 99  | 106 | 455.2388 | 1362.6946 | 1362.6958 | -0.0012 | -0.9 | 3 |
| 49.1  | 0.00027 | K.ALVSVR.Q                                          | 189 | 195 | 438.2742 | 874.5339  | 874.5358  | -0.0019 | -2.2 | 2 |
| 49.1  | 0.0035  | K.DTCFSTEGPNLVTR.C                                  | 565 | 578 | 435.9644 | 1739.8287 | 1739.8271 | 0.0016  | 0.9  | 4 |
| 48.75 | 0.0018  | R.NECFLQHK.D                                        | 99  | 106 | 682.3575 | 1362.7004 | 1362.6958 | 0.0046  | 3.4  | 2 |
| 48.51 | 0.0056  | K.ENPTTFMGHYLHEVAR.R + iTRAQ4plex (Y)               | 129 | 144 | 730.7072 | 2189.0998 | 2189.0931 | 0.0066  | 3    | 3 |
| 47.2  | 0.0039  | R.RPCFSALTVDETYVPK.E + iTRAQ4plex (Y)               | 485 | 500 | 579.5665 | 2314.237  | 2314.2357 | 0.0013  | 0.6  | 4 |
| 45.82 | 0.0019  | K.NYAEAK.D                                          | 318 | 323 | 492.273  | 982.5314  | 982.5327  | -0.0013 | -1.3 | 2 |
| 44.82 | 0.0062  | R.RPCFSALTVDETYVPK.E + iTRAQ4plex (Y)               | 485 | 500 | 463.8556 | 2314.2415 | 2314.2357 | 0.0058  | 2.5  | 5 |
| 43.98 | 0.015   | R.LSQTFPNADF AIEITK.L + MDI_224_KNH (HKN)           | 219 | 233 | 684.0144 | 2049.0213 | 2049.0329 | -0.0116 | -5.7 | 3 |
| 43.29 | 0.017   | R.ENYGELADCCTK.Q + iTRAQ4plex (Y)                   | 82  | 93  | 473.7279 | 1890.8825 | 1890.8817 | 0.0008  | 0.4  | 4 |
| 43.25 | 0.016   | R.ENYGELADCCTK.Q + iTRAQ4plex (Y)                   | 82  | 93  | 631.3046 | 1890.8921 | 1890.8817 | 0.0103  | 5.4  | 3 |
| 42.27 | 0.046   | K.LCAIPNLRENYGELADCCTK.Q                            | 74  | 93  | 672.0804 | 2684.2925 | 2684.2964 | -0.0039 | -1.5 | 4 |
| 40.73 | 0.0048  | K.CSYDEHAK.L                                        | 34  | 41  | 433.2058 | 1296.5957 | 1296.6012 | -0.0055 | -4.2 | 3 |
| 40.47 | 0.0012  | K.SEIAHR.Y                                          | 5   | 10  | 428.7398 | 855.4649  | 855.4684  | -0.0035 | -4.1 | 2 |
| 39.37 | 0.0094  | K.ESCLTPK.L                                         | 175 | 181 | 561.8084 | 1121.6023 | 1121.5994 | 0.0029  | 2.6  | 2 |
| 38.4  | 0.031   | K.DVFLGTFLYEYSR.R + iTRAQ4plex (Y)                  | 324 | 336 | 475.2572 | 1896.9997 | 1896.9865 | 0.0132  | 7    | 4 |
| 36.71 | 0.04    | K.TNCDLYEK.L + iTRAQ4plex (Y)                       | 390 | 397 | 492.2542 | 1473.7408 | 1473.7499 | -0.0091 | -6.2 | 3 |
| 36.31 | 0.016   | R.RHPDYSVSLLLR.L + iTRAQ4plex (Y)                   | 337 | 348 | 436.7577 | 1743.0016 | 1743.0035 | -0.0019 | -1.1 | 4 |
| 35.01 | 0.021   | K.LCAIPNL.R.E                                       | 74  | 81  | 550.8215 | 1099.6284 | 1099.6294 | -0.001  | -0.9 | 2 |
| 34.99 | 0.019   | K.KYEATLEK.C                                        | 352 | 359 | 471.9488 | 1412.8244 | 1412.824  | 0.0004  | 0.3  | 3 |
| 34.04 | 0.0066  | R.AELAK.Y                                           | 258 | 262 | 410.262  | 818.5094  | 818.5105  | -0.0011 | -1.3 | 2 |
| 31.32 | 0.015   | K.AWAVAR.L                                          | 213 | 218 | 409.2423 | 816.4701  | 816.4728  | -0.0027 | -3.3 | 2 |
| 29.81 | 0.016   | K.LDGVK.E                                           | 182 | 186 | 410.2625 | 818.5104  | 818.5105  | -0.0001 | -0.1 | 2 |

Supplemental Table S2. Identification of GSH-MDI modified albumin peptide in samples from GSH-MDI exposed mice (114, 115) not control mice exposed to MDI-m (116, 117). Differences in amount of different ions with masses that match peptides of mouse albumin, or MDI modified mouse albumin from GSH-MDI exposed mice (e.g. 114 and 115) vs. controls (116 and 117). Shown are the Score, Expectation, Sequence and Charge data (same as Table S1), paired with quantitation of the respective amounts of ion with 114, 115, 116, or 117 labels, and their relative ratios as labeled. The ion mass corresponding to the GSH-MDI modified murine albumin peptide of interested is highlighted.

| Score  | Expectation | Peptide Sequence                                    | Charge | 115/114 | 116/114 | 117/114 | 114      | 115      | 116      | 117      |
|--------|-------------|-----------------------------------------------------|--------|---------|---------|---------|----------|----------|----------|----------|
| 164.24 | 6.20E-14    | K.AHCLSEVEHDTMPADLPAIAADFVEDQEVCK.N                 | 4      | 1.13    | 1.092   | 0.988   | 1000.544 | 1524.748 | 1258.692 | 864.539  |
| 131.96 | 1.10E-10    | K.AHCLSEVEHDTMPADLPAIAADFVEDQEVCK.N                 | 5      | 1.059   | 1.023   | 0.956   | 336.277  | 479.944  | 396.33   | 281.045  |
| 123.07 | 8.90E-10    | K.AHCLSEVEHDTMPADLPAIAADFVEDQEVCK.N + Oxidation (M) | 4      | 0.874   | 0.701   | 1.06    | 186.863  | 220.235  | 150.83   | 173.152  |
| 122.94 | 2.50E-10    | K.TVMDDFAQFLDTCKC.A + Oxidation (M)                 | 2      | 1.082   | 0.682   | 0.727   | 137.761  | 201.017  | 108.186  | 87.587   |
| 122.46 | 2.70E-10    | K.TVMDDFAQFLDTCKC.A                                 | 2      | 1.35    | 1.259   | 0.818   | 122.228  | 222.517  | 177.269  | 87.446   |
| 120.78 | 1.60E-10    | R.LSQTFPNADFAEITK.L                                 | 2      | 1.311   | 1.372   | 1.335   | 1649.839 | 2914.993 | 2606.508 | 1926.182 |
| 119.53 | 5.50E-10    | K.TVMDDFAQFLDTCKC.A + Oxidation (M)                 | 3      | 1.038   | 0.987   | 0.898   | 6087.801 | 8521.661 | 6918.267 | 4778.308 |
| 112.97 | 2.30E-09    | K.ENPTTFMGHYLHEVAR.R + Oxidation (M)                | 4      | 1.09    | 1.136   | 1.095   | 56.345   | 82.785   | 73.693   | 53.973   |
| 111.21 | 1.20E-08    | R.RHPYFYAPPELLYAEQYNEILTQCCAEADK.E                  | 4      | 0.827   | 1.051   | 0.886   | 506.678  | 564.806  | 613.258  | 392.682  |
| 110.85 | 1.30E-08    | R.RHPYFYAPPELLYAEQYNEILTQCCAEADK.E                  | 5      | 0.758   | 1.027   | 0.792   | 571.914  | 584.572  | 676.707  | 396.065  |
| 110.8  | 1.40E-08    | R.RHPYFYAPPELLYAEQYNEILTQCCAEADK.E                  | 4      | 0.905   | 0.864   | 0.91    | 324.103  | 395.393  | 322.391  | 258.005  |
| 109.86 | 1.10E-08    | K.CCAEANPPACYGTVLAEFQPLVEEPK.N                      | 3      | 1.234   | 0.487   | 0.368   | 86.254   | 143.481  | 48.356   | 27.793   |
| 108.57 | 6.50E-09    | K.TVMDDFAQFLDTCKC.A + Oxidation (M)                 | 4      | 1.065   | 0.9     | 0.81    | 380.075  | 545.494  | 393.858  | 269.189  |
| 108.22 | 3.70E-10    | K.GLVLIAFSQYLQK.C                                   | 3      | 0.994   | 1.442   | 0.813   | 143.335  | 192.094  | 237.968  | 101.839  |
| 108.16 | 2.60E-08    | R.HPYFYAPPELLYAEQYNEILTQCCAEADK.E                   | 5      | 0.867   | 0.877   | 0.752   | 281.399  | 329.021  | 284.215  | 184.936  |
| 105.42 | 1.40E-08    | K.TVMDDFAQFLDTCKC.A                                 | 4      | 0.928   | 0.836   | 0.764   | 459.105  | 574.581  | 442.242  | 306.845  |
| 104.25 | 5.00E-09    | K.LGEYGFQNALV.R.Y                                   | 3      | 0.82    | 0.759   | 0.584   | 316.474  | 349.802  | 276.644  | 161.473  |
| 100.37 | 1.80E-08    | R.LSQTFPNADFAEITK.L                                 | 3      | 1.061   | 0.901   | 1.02    | 4902.894 | 7010.584 | 5086.214 | 4373.495 |
| 96.83  | 5.30E-08    | K.DVFLGTFLYEYSR.R                                   | 3      | 1.168   | 1.359   | 0.992   | 276.943  | 435.991  | 433.352  | 240.328  |
| 96.44  | 5.50E-08    | K.TCVADESAANCDK.S                                   | 3      | 1.364   | 1.115   | 1.036   | 735.166  | 1351.518 | 943.954  | 665.769  |
| 95.96  | 5.00E-08    | R.LPCVEDYLSAILNR.V                                  | 3      | 1.283   | 1.128   | 0.942   | 189.913  | 328.533  | 246.758  | 156.458  |
| 93.48  | 5.00E-08    | K.APQVSTPTLVEAAR.N                                  | 3      | 0.906   | 0.417   | 0.869   | 80.762   | 98.602   | 38.812   | 61.358   |
| 92.07  | 6.90E-08    | K.ECCHGDLLCADDR.A                                   | 3      | 0.932   | 0.978   | 0.785   | 284.027  | 356.932  | 319.958  | 195.07   |
| 90.99  | 2.30E-07    | K.DTCFSTEGPNLVTR.C                                  | 3      | 0.732   | 1.373   | 0.864   | 290.917  | 286.913  | 459.846  | 219.827  |
| 89.73  | 1.00E-07    | K.LVQEVTFDAK.T                                      | 3      | 0.935   | 1.13    | 1.107   | 97.464   | 122.808  | 126.79   | 94.342   |
| 88.41  | 6.20E-07    | K.ENPTTFMGHYLHEVAR.R                                | 4      | 0.841   | 0.927   | 0.669   | 1333.428 | 1512.284 | 1423.651 | 779.787  |
| 87.89  | 7.20E-07    | K.AETTFHSDICTLPEK.E                                 | 4      | 0.91    | 0.886   | 0.958   | 885.134  | 1085.517 | 903.437  | 741.623  |
| 87.88  | 2.60E-07    | R.LPCVEDYLSAILNR.V + iTRAQ4plex (Y)                 | 3      | ---     | ---     | ---     | ---      | ---      | ---      | ---      |
| 87.87  | 1.80E-07    | R.HPDYSVSLLR.L                                      | 3      | 1.05    | 1.106   | 1.145   | 986.101  | 1395.621 | 1255.832 | 987.113  |
| 87.55  | 3.40E-07    | R.LPCVEDYLSAILNR.V                                  | 2      | 1.202   | 0.981   | 0.97    | 1814.009 | 2939.292 | 2048.939 | 1538.808 |
| 86.94  | 0.0000034   | K.AHCLSEVEHDTMPADLPAIAADFVEDQEVCK.N                 | 6      | 1.956   | 1.335   | 0.75    | 41.334   | 109.022  | 63.559   | 27.09    |
| 85.1   | 0.0000056   | K.AHCLSEVEHDTMPADLPAIAADFVEDQEVCK.N + Oxidation (M) | 5      | 0.96    | 0.687   | 1.102   | 216.783  | 280.449  | 171.544  | 208.875  |
| 84.52  | 0.0000038   | K.CCAEANPPACYGTVLAEFQPLVEEPK.N                      | 4      | 1.178   | 1.086   | 0.706   | 883.677  | 1403.222 | 1104.804 | 545.325  |
| 84.46  | 3.30E-07    | R.RHPDYSVSLLR.L                                     | 3      | 2.535   | 2.173   | 1.037   | 695.841  | 2378.196 | 1741.32  | 631.236  |
| 82.94  | 0.0000022   | K.ENPTTFMGHYLHEVAR.R                                | 3      | 1.037   | 0.559   | 0.873   | 99.274   | 138.734  | 63.856   | 75.744   |
| 82.52  | 5.20E-07    | K.APQVSTPTLVEAAR.N                                  | 2      | 1.068   | 1.062   | 0.957   | 4519.768 | 6506.785 | 5526.288 | 3782.262 |
| 81.26  | 0.0000014   | R.YNDLGEQHF.K.G                                     | 3      | 1.24    | 1.266   | 1.271   | 463.412  | 774.519  | 675.434  | 514.969  |
| 80.91  | 0.0000023   | K.DTCFSTEGPNLVTR.C                                  | 2      | 1.028   | 0.916   | 1.032   | 3834.933 | 5317.357 | 4045.273 | 3460.655 |
| 79.86  | 0.0000024   | R.ENYGELADCCTK.Q                                    | 3      | 1.056   | 0.9     | 1.223   | 1129.025 | 1606.791 | 1170.413 | 1207.494 |
| 79.44  | 0.000016    | R.RHPYFYAPPELLYAEQYNEILTQCCAEADK.E + iTRAQ4plex (Y) | 5      | ---     | ---     | ---     | ---      | ---      | ---      | ---      |
| 78.56  | 0.0000017   | K.ECCHGDLLCADDR.A                                   | 2      | 0.96    | 1.088   | 0.968   | 667.094  | 863.502  | 835.5    | 564.436  |
| 77.96  | 0.0000014   | K.LVQEVTFDAK.T                                      | 2      | 1.112   | 1.082   | 1.245   | 4971.943 | 7453.262 | 6196.095 | 5412.037 |
| 76.97  | 0.0000089   | K.AETTFHSDICTLPEK.E                                 | 3      | 0.884   | 0.899   | 0.869   | 1425.2   | 1699.445 | 1474.729 | 1083.266 |
| 76.24  | 0.000043    | R.RHPYFYAPPELLYAEQYNEILTQCCAEADK.E                  | 6      | 0.823   | 0.75    | 0.716   | 126.157  | 139.986  | 109.035  | 78.997   |
| 75.54  | 9.10E-07    | K.QTALAELVK.H                                       | 3      | 1.338   | 1.146   | 1.124   | 3048.488 | 5497.75  | 4024.009 | 2996.128 |
| 74.54  | 0.000016    | K.AADKDTCFSTEGPNLVTR.C                              | 3      | 0.222   | 0.432   | 0.108   | 154.012  | 46.154   | 76.609   | 14.498   |
| 73.98  | 0.000011    | K.YMCENQATISSK.L + Oxidation (M)                    | 3      | 1.257   | 1.348   | 0.76    | 35.31    | 59.858   | 54.804   | 23.454   |
| 73.52  | 0.000012    | K.YMCENQATISSK.L                                    | 3      | 0.969   | 0.884   | 0.67    | 2631.077 | 3436.489 | 2678.19  | 1541.174 |
| 70.94  | 0.00001     | K.LGEYGFQNALV.R.Y                                   | 2      | 0.93    | 0.868   | 0.634   | 2479.885 | 3109.351 | 2479.402 | 1373.72  |
| 70.25  | 0.0000015   | K.GLVLIAFSQYLQK.C + iTRAQ4plex (Y)                  | 4      | ---     | ---     | ---     | ---      | ---      | ---      | ---      |
| 70.16  | 0.000026    | R.RPCFSALTVEDETVVPK.E                               | 3      | 1.379   | 1.283   | 1.239   | 222.527  | 413.616  | 328.731  | 241.118  |
| 69.32  | 0.000011    | R.RHPDYSVSLLR.L                                     | 4      | 1.47    | 1.43    | 1.185   | 589.484  | 1168.459 | 970.723  | 610.984  |
| 68.86  | 0.0000042   | K.QTALAELVK.H                                       | 2      | 1.042   | 0.971   | 0.911   | 1496.185 | 2102.222 | 1672.721 | 1192.235 |
| 67.5   | 0.000074    | K.ENPTTFMGHYLHEVAR.R + iTRAQ4plex (Y)               | 5      | ---     | ---     | ---     | ---      | ---      | ---      | ---      |
| 66.71  | 0.00002     | R.YTQKAPQVSTPTLVEAAR.N                              | 3      | 0.237   | 0.329   | 0.368   | 117.598  | 37.582   | 44.531   | 37.834   |
| 65.78  | 0.000023    | K.SLHTLFGDK.L                                       | 3      | 0.98    | 1.049   | 1.081   | 302.483  | 399.683  | 365.343  | 285.887  |
| 65.67  | 0.0000048   | K.GLVLIAFSQYLQK.C + iTRAQ4plex (Y)                  | 3      | ---     | ---     | ---     | ---      | ---      | ---      | ---      |
| 64.93  | 0.000074    | R.LSQTFPNADFAEITK.L                                 | 4      | 0.941   | 0.74    | 0.925   | 311.199  | 394.828  | 265.363  | 251.801  |
| 64.69  | 0.000084    | K.DVFLGTFLYEYSR.R                                   | 2      | 1.103   | 1.039   | 1.112   | 416.174  | 618.738  | 498.192  | 404.721  |
| 64.26  | 0.000003    | K.KQTALAELVK.H                                      | 3      | 0.857   | 0.485   | 0.308   | 1288.727 | 1488.647 | 719.862  | 347.638  |
| 63.45  | 0.000098    | R.ENYGELADCCTK.Q                                    | 4      | 0.994   | 0.784   | 0.949   | 527.307  | 706.576  | 476.061  | 437.414  |
| 62.75  | 0.000064    | K.TNCDLYEK.L                                        | 2      | 1.567   | 0.61    | 0.713   | 22.651   | 47.857   | 15.92    | 14.119   |
| 60.53  | 0.000091    | R.YTQKAPQVSTPTLVEAAR.N                              | 4      | 0.778   | 0.576   | 0.544   | 112.634  | 118.158  | 74.691   | 53.594   |
| 59.88  | 0.000099    | K.TPVSEHVTK.C                                       | 3      | 1.419   | 1.264   | 1.183   | 107.52   | 205.688  | 156.492  | 111.204  |
| 57.89  | 0.00018     | K.LGEYGFQNALV.R.Y + iTRAQ4plex (Y)                  | 4      | ---     | ---     | ---     | ---      | ---      | ---      | ---      |
| 57.81  | 0.000055    | K.CCSGSLVER.R                                       | 2      | 1.424   | 1.418   | 1.37    | 18.607   | 35.719   | 30.38    | 22.291   |
| 57.59  | 0.00016     | K.TPVSEHVTK.C                                       | 2      | 1.28    | 1.273   | 1.14    | 156.716  | 270.536  | 229.747  | 156.267  |
| 57.14  | 0.00044     | K.DVFLGTFLYEYSR.R + iTRAQ4plex (Y)                  | 3      | ---     | ---     | ---     | ---      | ---      | ---      | ---      |
| 56.71  | 0.0002      | K.LGEYGFQNALV.R.Y + iTRAQ4plex (Y)                  | 3      | ---     | ---     | ---     | ---      | ---      | ---      | ---      |
| 55.4   | 0.0028      | K.DDNPSLPPFERPEAEAMCTSFK.E + Oxidation (M)          | 4      | 0.956   | 0.847   | 0.72    | 6861.314 | 8841.969 | 6690.812 | 4320.424 |
| 54.35  | 0.0022      | R.YTQKAPQVSTPTLVEAAR.N + MDI_614_KNH (HKN)          | 3      | 0.612   | 0.098   | -0.007  | 65.574   | 54.072   | 7.422    | -0.42    |
| 54.07  | 0.00012     | K.LATDLTK.V                                         | 2      | 2.29    | 1.592   | 1.956   | 136.262  | 420.62   | 249.839  | 233.048  |
| 53.92  | 0.00032     | K.ECCHGDLLCADDR.A                                   | 4      | 1.403   | 1.547   | 1.283   | 40.338   | 76.293   | 71.879   | 45.27    |
| 53.35  | 0.0043      | K.DDNPSLPPFERPEAEAMCTSFK.E                          | 4      | 1.04    | 0.91    | 0.822   | 2226.642 | 3122.468 | 2332.973 | 1600.534 |

|       |         |                                                     |   |        |        |       |          |           |          |          |
|-------|---------|-----------------------------------------------------|---|--------|--------|-------|----------|-----------|----------|----------|
| 53.24 | 0.0005  | K.LGEYGFQNAILVRYTQK.A                               | 4 | 0.423  | 0.246  | 0.255 | 157.378  | 89.802    | 44.645   | 35.109   |
| 52.51 | 0.00025 | K.ATAEQLK.T                                         | 2 | 1.062  | 0.97   | 1.125 | 3307.143 | 4733.199  | 3696.103 | 3253.184 |
| 51.82 | 0.0051  | K.ECCHGDLLCADDRALAK.Y                               | 4 | 2.71   | 1.672  | 0.516 | 82.829   | 302.59    | 159.518  | 37.358   |
| 51.75 | 0.0031  | K.DTCFSTEGPNLVTRCK.D                                | 4 | 1.06   | 0.62   | 0.688 | 67.88    | 96.966    | 48.486   | 40.824   |
| 50.82 | 0.00078 | K.YEATLEK.C                                         | 2 | 1.091  | 0.736  | 0.666 | 4098.41  | 6028.849  | 3472.669 | 2386.04  |
| 50.03 | 0.014   | R.RHPYFYAPELlyYAEQYNEILTQCCAEADK.E + iTRAQ4plex (Y) | 6 | ---    | ---    | ---   | ---      | ---       | ---      | ---      |
| 50.03 | 0.00068 | R.VCLLHEK.T                                         | 2 | 0.808  | 0.844  | 0.876 | 146.195  | 159.262   | 142.111  | 111.954  |
| 49.57 | 0.0006  | K.CCTLPEDQR.L                                       | 2 | 1      | 1.286  | 0.735 | 40.797   | 54.989    | 60.399   | 26.22    |
| 49.51 | 0.01    | K.DDNPSLPPFERPEAEAMCTSFK.E                          | 3 | 0.67   | 1.548  | 1.033 | 31.677   | 28.611    | 56.483   | 28.604   |
| 49.18 | 0.0017  | R.NECFLQHK.D                                        | 3 | 0.947  | 1.031  | 0.664 | 929.045  | 1185.869  | 1102.995 | 539.155  |
| 49.1  | 0.0035  | K.DTCFSTEGPNLVTR.C                                  | 4 | 0.733  | 1.443  | 0.99  | 13.702   | 13.539    | 22.767   | 11.864   |
| 49.1  | 0.00027 | K.ALVSVR.Q                                          | 2 | 1.286  | 1.302  | 1.177 | 6363.091 | 11034.403 | 9542.412 | 6551.469 |
| 48.75 | 0.0018  | R.NECFLQHK.D                                        | 2 | 0.879  | 1.308  | 0.992 | 60.879   | 72.161    | 91.693   | 52.816   |
| 48.51 | 0.0056  | K.ENPTTFMGHYLHEVAR.R + iTRAQ4plex (Y)               | 3 | ---    | ---    | ---   | ---      | ---       | ---      | ---      |
| 47.2  | 0.0039  | R.RPCFSALTVDETYVPK.E + iTRAQ4plex (Y)               | 4 | ---    | ---    | ---   | ---      | ---       | ---      | ---      |
| 45.82 | 0.0019  | K.NYAEAK.D                                          | 2 | 1.299  | 1.295  | 1.493 | 1689.788 | 2959.362  | 2520.208 | 2205.597 |
| 44.82 | 0.0062  | R.RPCFSALTVDETYVPK.E + iTRAQ4plex (Y)               | 5 | ---    | ---    | ---   | ---      | ---       | ---      | ---      |
| 43.98 | 0.015   | R.LSQTFPNADFAEITK.L + MDI_224_KNH (HKN)             | 3 | 0.685  | 1.034  | 0.871 | 42.218   | 38.97     | 50.268   | 32.142   |
| 43.29 | 0.017   | R.ENYGELADCCTK.Q + iTRAQ4plex (Y)                   | 4 | ---    | ---    | ---   | ---      | ---       | ---      | ---      |
| 43.25 | 0.016   | R.ENYGELADCCTK.Q + iTRAQ4plex (Y)                   | 3 | ---    | ---    | ---   | ---      | ---       | ---      | ---      |
| 42.27 | 0.046   | K.LCAIPNLRENYGELADCCTK.Q                            | 4 | 17.455 | -0.922 | 0.7   | 22.163   | 521.543   | -23.527  | 13.568   |
| 42.14 | 0.059   | K.DDNPSLPPFERPEAEAMCTSFK.E + Oxidation (M)          | 3 | 0.939  | 0.854  | 0.745 | 1636.777 | 2071.693  | 1609.36  | 1066.566 |
| 40.73 | 0.0048  | K.CSYDEHAK.L                                        | 3 | 1.215  | 0.797  | 0.574 | 76.943   | 126.006   | 70.611   | 38.633   |
| 40.47 | 0.0012  | K.SEIAHR.Y                                          | 2 | 0.507  | 1.001  | 0.518 | 27.581   | 18.858    | 31.806   | 12.5     |
| 39.37 | 0.0094  | K.ESCLTPK.L                                         | 2 | 2.736  | 1.487  | 1.243 | 26.736   | 98.613    | 45.792   | 29.048   |
| 38.4  | 0.031   | K.DVFLGTFlyEYSR.R + iTRAQ4plex (Y)                  | 4 | ---    | ---    | ---   | ---      | ---       | ---      | ---      |
| 36.71 | 0.04    | K.TNCDLYEK.L + iTRAQ4plex (Y)                       | 3 | ---    | ---    | ---   | ---      | ---       | ---      | ---      |
| 36.31 | 0.016   | R.RHPDYSVSLLLR.L + iTRAQ4plex (Y)                   | 4 | ---    | ---    | ---   | ---      | ---       | ---      | ---      |
| 35.01 | 0.021   | K.LCAIPNLR.E                                        | 2 | 1.147  | 1.11   | 1.042 | 791.722  | 1224.496  | 1011.908 | 721.039  |
| 34.99 | 0.019   | K.KYEATLEK.C                                        | 3 | 1.193  | 1.28   | 0.709 | 143.577  | 230.867   | 211.671  | 89.009   |
| 34.04 | 0.0066  | R.AELAK.Y                                           | 2 | 1.081  | 0.937  | 1.112 | 2237.619 | 3262.597  | 2414.247 | 2176.381 |
| 31.32 | 0.015   | K.AWAVAR.L                                          | 2 | 0.962  | 1.015  | 0.887 | 1825.25  | 2367.133  | 2134.352 | 1416.22  |
| 29.81 | 0.016   | K.LDGVK.E                                           | 2 | 1.433  | 1.026  | 0.872 | 365.843  | 706.57    | 432.401  | 279.043  |

## SUPPLEMENTAL REFERENCES

1. Wisnewski, A.V., Liu, J. and Redlich, C.A. (2013) Connecting glutathione with immune responses to occupational methylene diphenyl diisocyanate exposure. *Chem. Biol. Interact.* 205, 38-45.
2. Reisser, M., Schmidt, B.F. and Brown, W.E. (2002) Synthesis, characterization, and solvolysis of mono- and bis-S-(glutathionyl) adducts of methylene-bis-(phenylisocyanate) (MDI). *Chem. Res. Toxicol.* 15, 1235-1241.
3. Jin R.Z. and Karol M.H. (1988) Intra- and intermolecular reactions of 4,4'-diisocyanatodiphenylmethane with human serum albumin. *Chem. Res Toxicol.* 1, 281-287.
